# Supplementary material for: Differential Alterations in Resting State Functional Connectivity Associated with Depressive Symptoms and Early Life Adversity
Source: MDPI journal article supplement (doi:10.3390/brainsci11050591), 2021-05-02
Supplement: s1 [file s1]

**A**

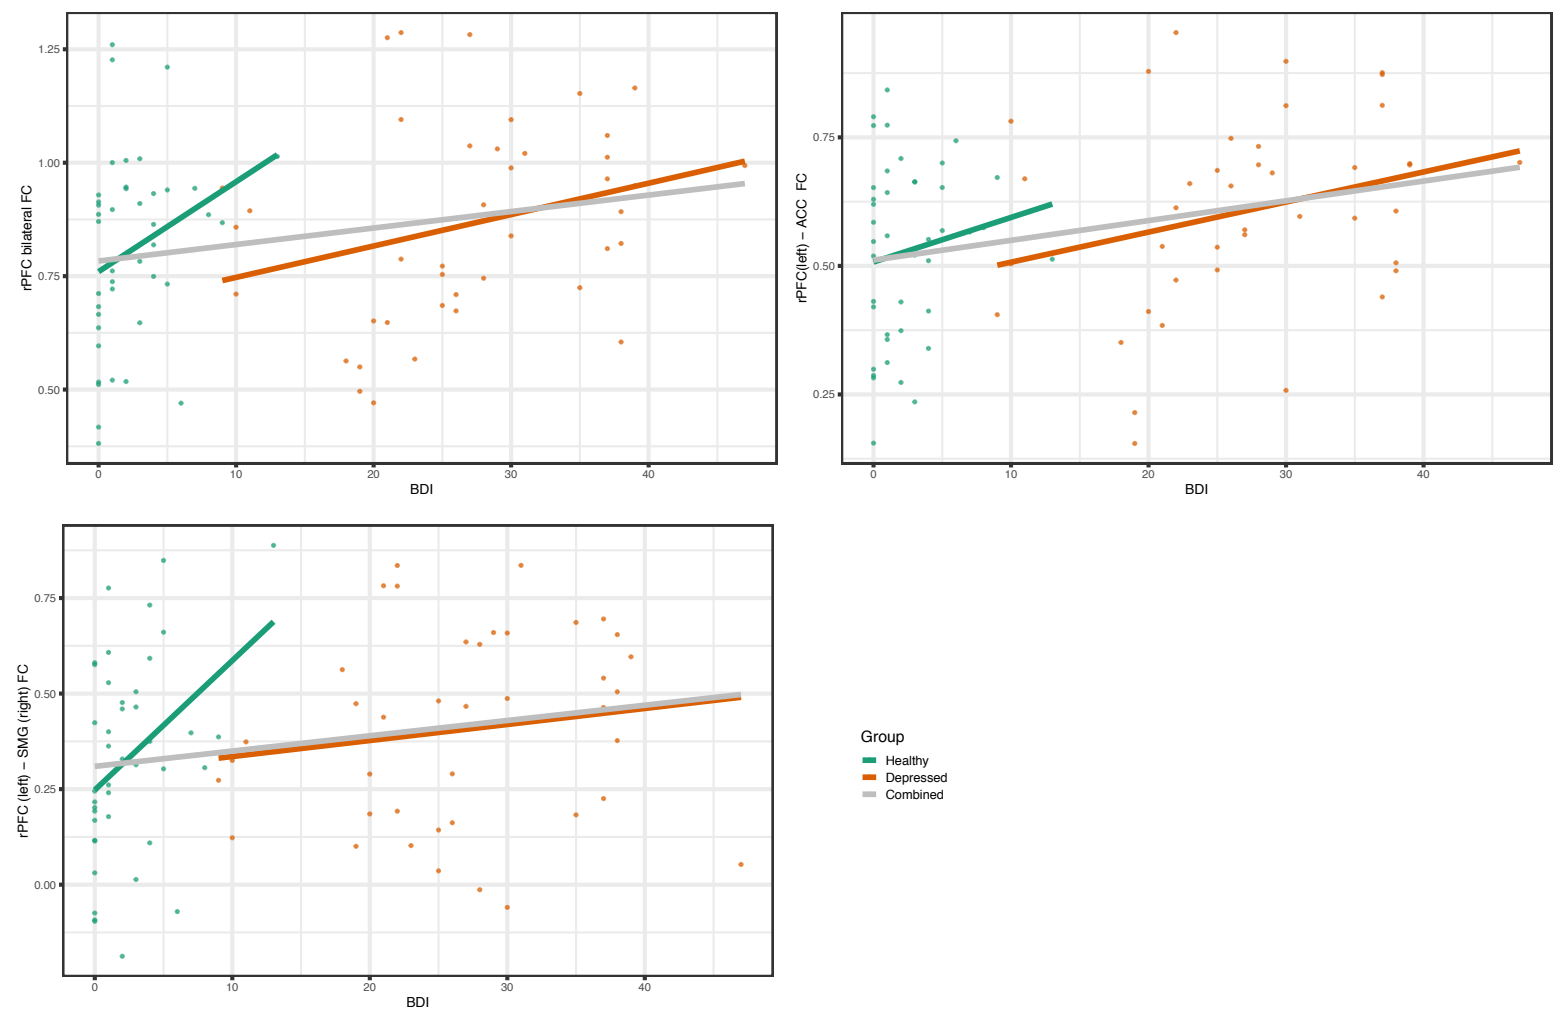

**B**

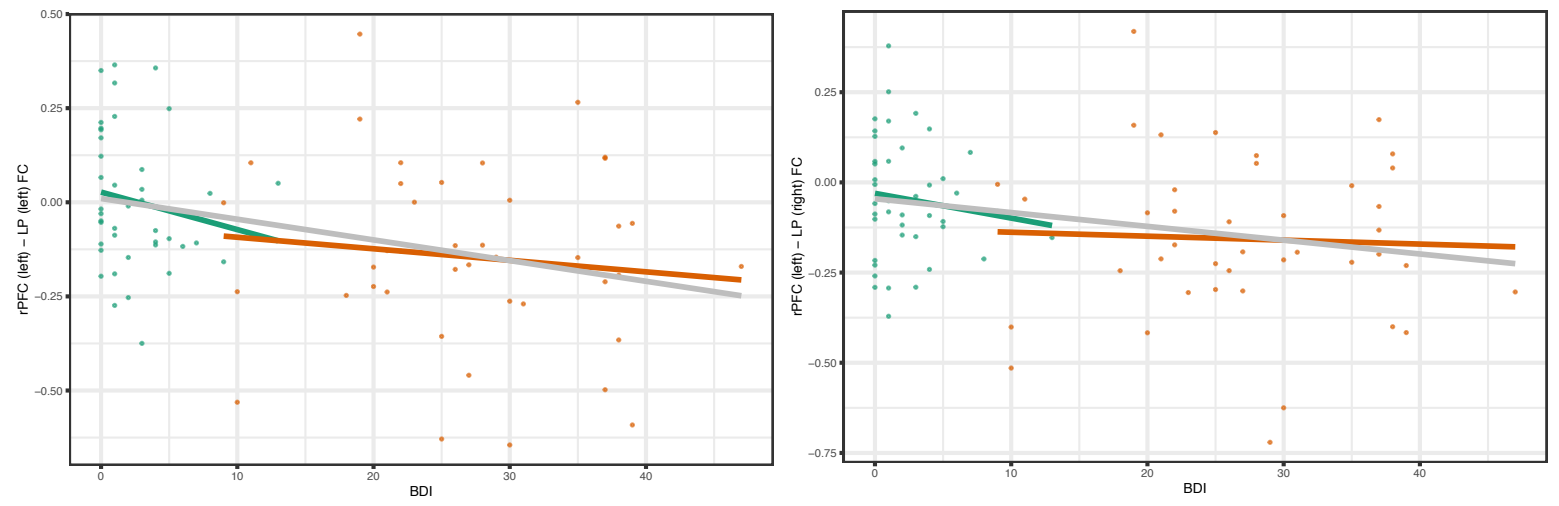

C

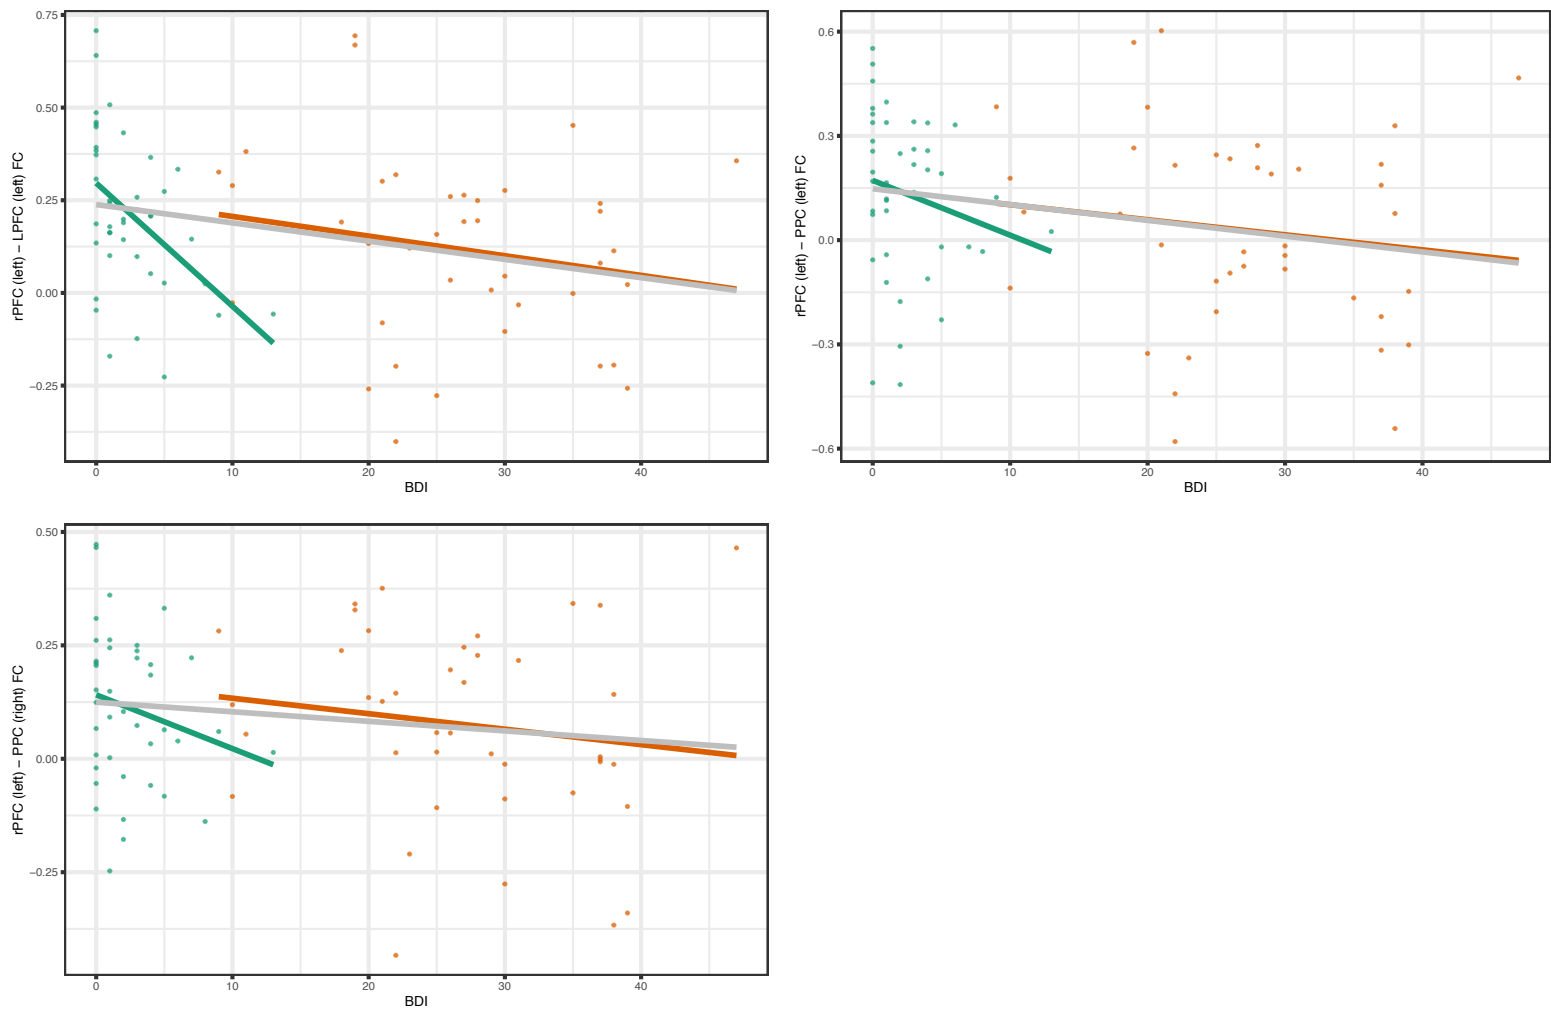

**Figure S1.** Associations between BDI-II and ROI-to-ROI functional connectivity (FC) for the depressed group, the healthy group, and combined, sorted by within- and between-network FC. A. Associations between BDI-II and FC within the Salience Network. B. Associations between BDI-II and FC of the Salience with the Default Mode Network. C. Associations between BDI-II and FC of the Salience with the Central Executive Network. ROI = region of interest, rPFC = rostral prefrontal cortex, ACC = anterior cingulate cortex, SMG = supramarginal gyrus, LP = lateral parietal, LPFC = lateral prefrontal cortex, PPC = posterior parietal cortex.

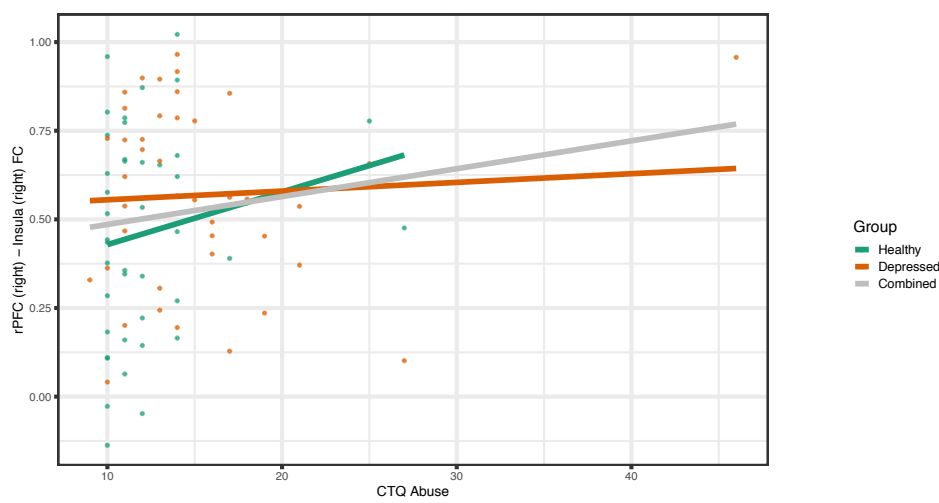

**Figure S2.** Association between CTQ abuse and functional connectivity (FC) of the right rostral prefrontal cortex (rPFC) with the right Insula for the depressed group, the healthy group, and combined.

**A**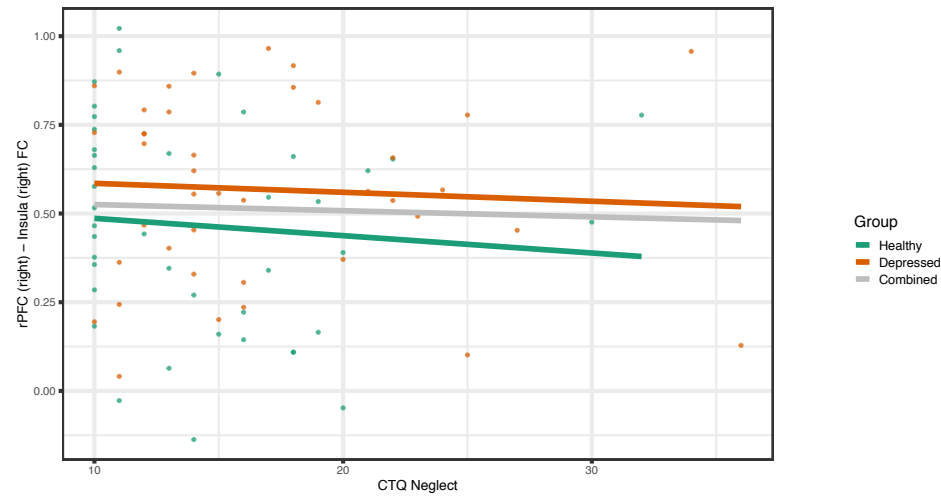**B**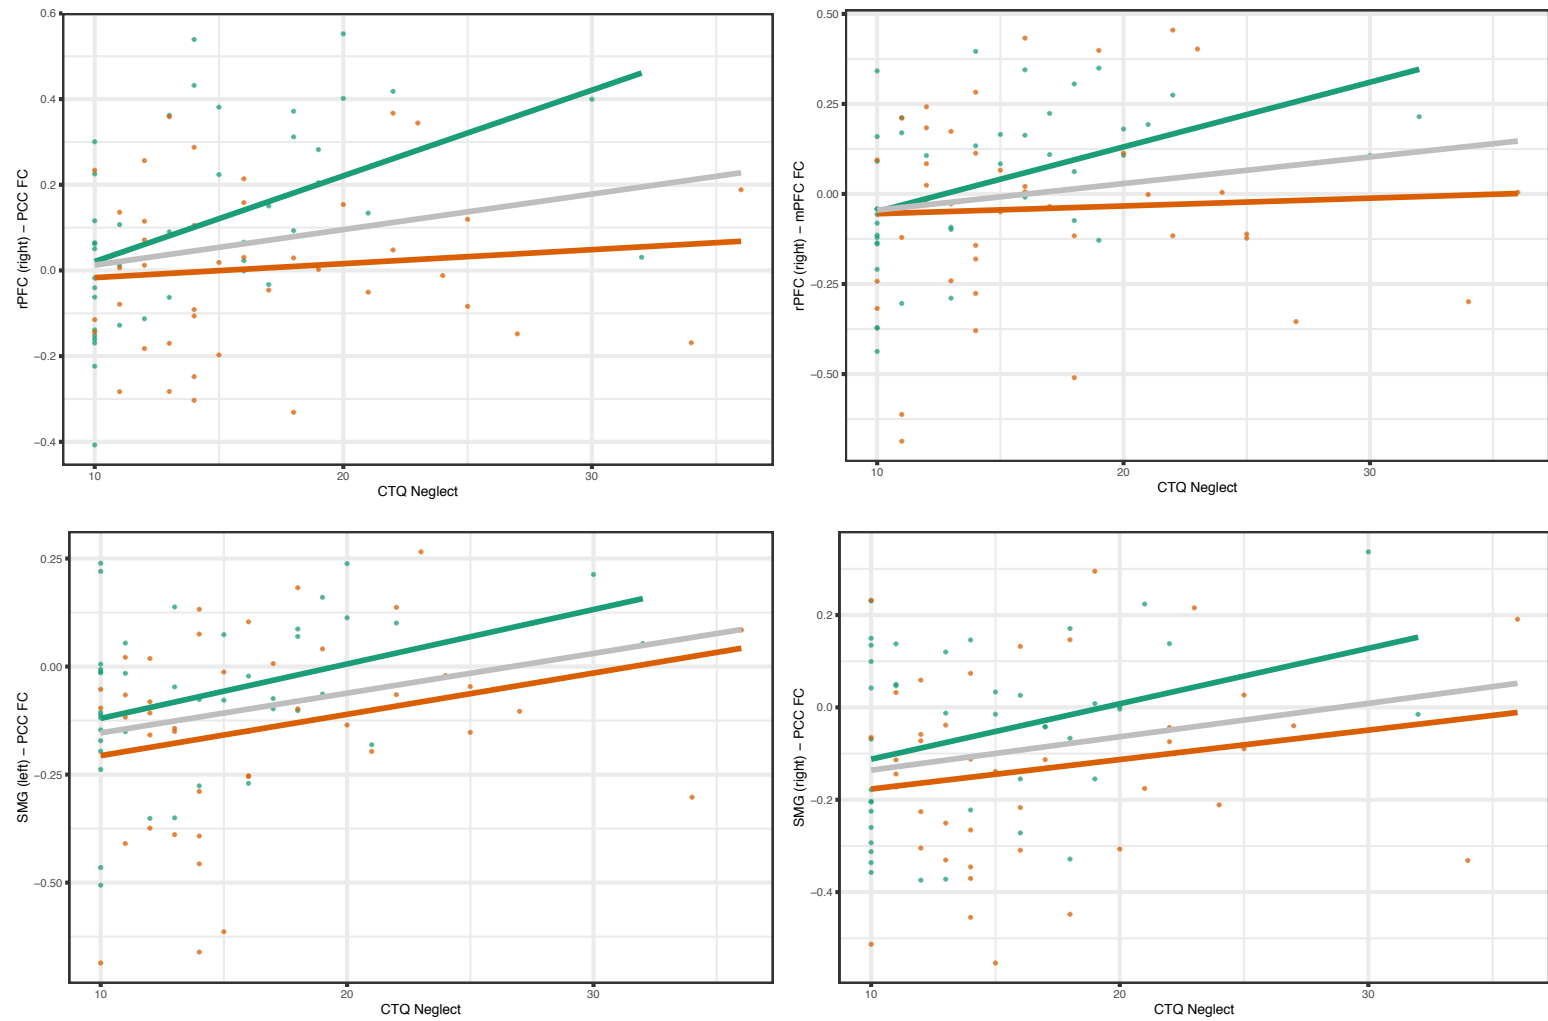

**Figure S3.** Associations between CTQ neglect and ROI-to-ROI functional connectivity (FC) for the depressed group, the healthy group, and combined, sorted by within- and between-network FC. A. Association between CTQ neglect and FC within the Salience Network. B. Associations between CTQ neglect and FC of the Salience with the Default Mode Network. ROI = region of interest, rPFC = rostral prefrontal cortex, mPFC = medial prefrontal cortex, SMG = supramarginal gyrus, PCC = precuneus cortex.

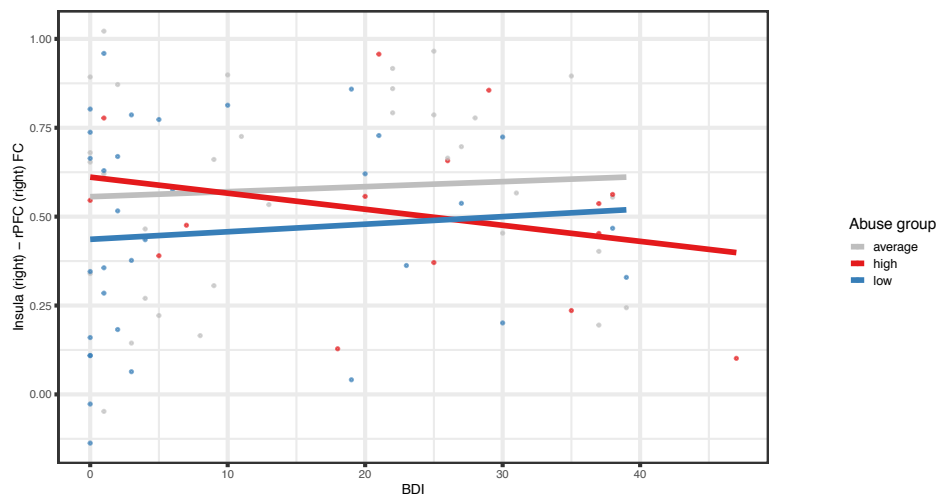

**Figure S4.** Moderation effect of CTQ abuse on the association between BDI-II and functional connectivity (FC) of the right rostral prefrontal cortex (rPFC) with the right Insula.
